# Supplementary material for: A novel mechanism of synaptic and cognitive impairments mediated via microRNA-30b in Alzheimer's disease
Source: PubMed Central journal article supplement — eBioMedicine. 2018 Dec 3;39:409–21. doi: 10.1016/j.ebiom.2018.11.059 (PMC6354659; doi:10.1016/j.ebiom.2018.11.059), 2018-12-03
Supplement: mmc1.pdf [file mmc1.pdf]

| Murine                                      | Human                                       |
|---------------------------------------------|---------------------------------------------|
| 3' ucgacucacauCCUACAAAUGu 5' mmu-miR-30b    | 3' ucgacucacauCCUACAAAUGu 5' hsa-miR-30b    |
| 5' ugucaaaaaauGAAUGUUUACu 3' Sirt1          | 5' caugcaaaaauGAAUGUUUACu 3' Sirt1          |
| 3' ucGACUCACAUCUCC-UACAAAUGu 5' mmu-miR-30b | 3' ucGACUCACAUCUCC-UACAAAUGu 5' hsa-miR-30b |
| 5' ucUUGCAUCUGGGUUUGUUUACa 3' Ephb2         | 5' ucCUGCAUCUGGGUUUGUUUACa 3' Ephb2         |
| 3' ucGACUCACA--UCCUACAAAUGu 5' mmu-miR-30b  | 3' ucgacucacauccuACAAAUGu 5' hsa-miR-30b    |
| 5' ccUUUACUGUACAUUUUGUUUACa 3' Gria2        | 5' uuacuguacuuuuUGUUUACa 3' Gria2           |

Suppl Fig. 1. Computationally predicted targets (ephB2, sirt1 and GluA2) of miR-30b in both human and murine.
