# Supplementary material for: A novel mechanism of synaptic and cognitive impairments mediated via microRNA-30b in Alzheimer's disease
Source: PubMed Central journal article supplement — eBioMedicine. 2018 Dec 3;39:409–21. doi: 10.1016/j.ebiom.2018.11.059 (PMC6354659; doi:10.1016/j.ebiom.2018.11.059), 2018-12-03
Supplement: mmc2.pdf [file mmc2.pdf]

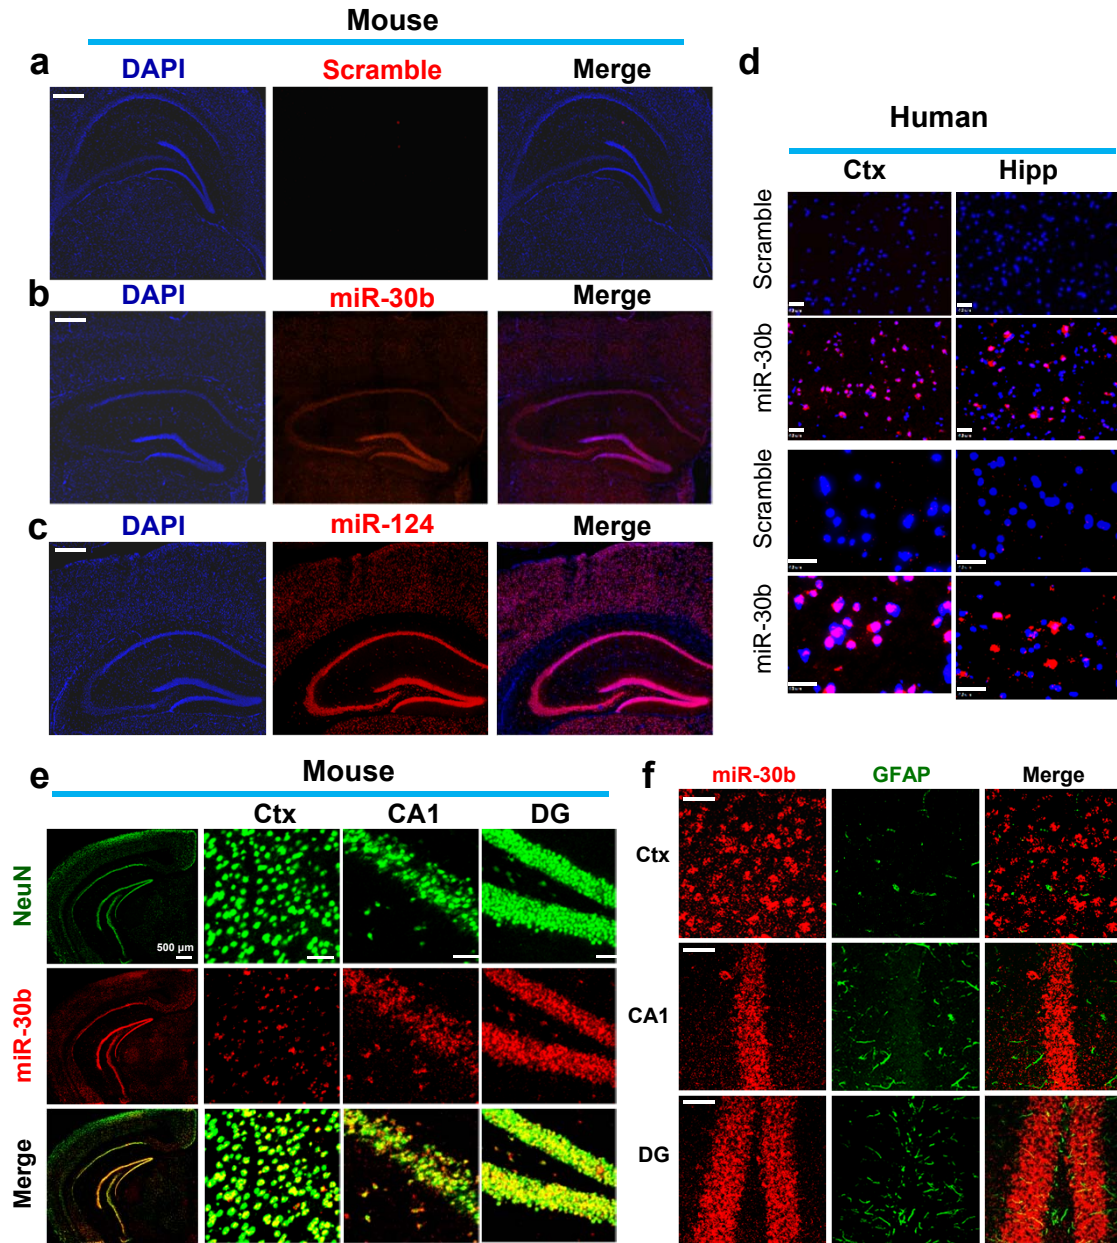

Suppl Fig. 2. Fluorescent in situ hybridization (FISH) analysis of miR-30b expression in the cortex and hippocampus. **a.** FISH analysis of miR-30b scramble as a negative control. **b.** Detection of miR-30b expression in the mouse brain. **c.** Detection of miR-124 expression in the mouse brain as a positive control of FISH analysis. Scale bars (**a-c**): 500  $\mu\text{m}$ .

**d.** Expression of miR-30b in human cortex and hippocampus. Scale bars: 40  $\mu\text{m}$ .

**e** miR-30b is primarily expressed in neurons of mouse brains indicated by well colocalized miR-30b with neuronal marker NeuN in the cortex (Ctx), hippocampal CA1, and dentate gyrus (DG).

Scale bars: 500 and 50  $\mu\text{m}$ . **f** Expression of miR-30b is lower in astrocytes indicated by not well colocalized miR-30b with GFAP, an astrocytic marker, in the cortex (Ctx), hippocampal CA1, and dentate gyrus (DG). Scale bars: 50  $\mu\text{m}$ .
