# Supplementary material for: A novel mechanism of synaptic and cognitive impairments mediated via microRNA-30b in Alzheimer's disease
Source: PubMed Central journal article supplement — eBioMedicine. 2018 Dec 3;39:409–21. doi: 10.1016/j.ebiom.2018.11.059 (PMC6354659; doi:10.1016/j.ebiom.2018.11.059), 2018-12-03
Supplement: mmc3.pdf [file mmc3.pdf]

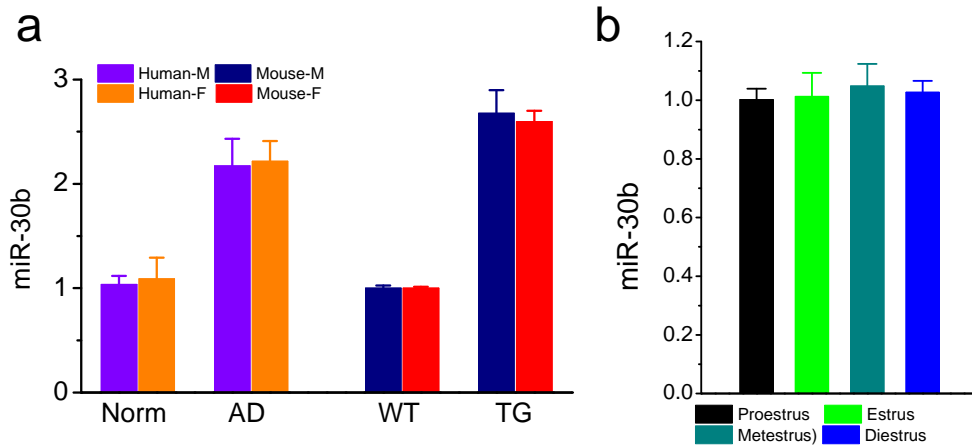

Suppl-Fig-3. Expression of miR-30b in the brain does not display gender-specific.

**a** No difference in expression of miR-30b in the hippocampus between males and females of both humans and mice. Error bars represent  $\pm$  SEM (humans: n=6/group and mice: n=11/group).

**b** No difference in expression of miR-30b in the hippocampus during the estrous cycle in 6-week-old female mice (n=4~6/group).
