# Supplementary material for: A novel mechanism of synaptic and cognitive impairments mediated via microRNA-30b in Alzheimer's disease
Source: PubMed Central journal article supplement — eBioMedicine. 2018 Dec 3;39:409–21. doi: 10.1016/j.ebiom.2018.11.059 (PMC6354659; doi:10.1016/j.ebiom.2018.11.059), 2018-12-03
Supplement: mmc4.pdf [file mmc4.pdf]

Mature miR-30b: 5' UGUAAACAUCCUACACUCAGCU 3'

Replace U with T: 5' TGTAACATCCTACACTCAGCT 3'

1x Sponge: 5' AGCTGAGTGTTCTGTTTACA 3'

6x Sponge:

GFP

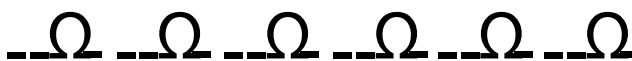

5'-CTAGC

AGCTGAGTGTTCTGTTTACAaattAGCTGAGTGTTCTGTTTACAaattAGCTG

AGTGTTCCTGTTTACAaattAGCTGAGTGTTCTGTTTACAaatt

AGCTGAGTGTTCTGTTTACAaattAGCTGAGTGTTCTGTTTACAGG -3'

Suppl-Fig. 4. miR-30b sponge (miR-30bs). The miRNA “sponge” method was used to create continuous miRNA loss-of-function by complementary binding to a miRNA of interest, as described previously<sup>20,23,35</sup>. miR-30bs contains six concatenated miR-30b binding sites with a central bulge/mismatch to prevent mRNA cleavage by Argonaute 2, as described previously<sup>22,23</sup>.
